# Supplementary material for: Effects of diurnal, lighting, and angle-of-incidence variation on anterior segment optical coherence tomography (AS-OCT) angle metrics
Source: BMC Ophthalmol. 2017 Mar 23;17:31. doi: 10.1186/s12886-017-0425-3 (PMC5364610; doi:10.1186/s12886-017-0425-3)
Supplement: Additional file 1: — Effects of Diurnal, Lighting, and Angle-of-Incidence Variation on Anterior Segment Optical Coherence Tomography Angle Metrics. Description of the data: Angle metrics were recorded from the scans of the morning and the afternoon with different lightining conditions. (XLSX 48 kb) [file 12886_2017_425_MOESM1_ESM.xlsx]

## Sheet: Legends
OD	1		Male	1		Caucasian	1
OS	2		Female	2		Asian	2
						South asian	3
						Afro- american	4

## Sheet: AM2
								Visante Light ON 270							ABS							% ERROR										Visante Light OFF 270							Visante Light OFF 265							Visante Light OFF 275
Date	Time	Groups	ID	Age	Study eye	Gender	Ethinicity	Groups Impfit	Largest implant fitted	SS angle	AOD500	AOD750	TISA500	TISA750			SS angle	AOD500	AOD750	TISA500	TISA750			SS angle	AOD500	AOD750	TISA500	TISA750		Groups Impfit	Largest Implant fitted	SS angle	AOD500	AOD750	TISA500	TISA750	Groups Impfit	Largest Implant fitted	SS angle	AOD500	AOD750	TISA500	TISA750	Groups Impfit	Largest Implant fitted	SS angle	AOD500	AOD750	TISA500
2012-06-26	Day 2 am	2	1	42	1	2	2	1	508	36.3	0.368	0.498	0.145	0.252			1.9	0.019	0.044	0.012	0.013			5.10067	5.29986	9.2437	8.63309	5.29532		1	508	38.2	0.394	0.475	0.146	0.255	0	None	34.6	0.344	0.454	0.135	0.234	0	None	37.2	0.383	0.422	0.137
		2	1	42	2	2	2	1	508	41.4	0.441	0.526	0.15	0.271			4	0.058	0.049	0.02	0.033			10.1523	14.0777	9.77069	14.2857	12.9666		0	None	36.5	0.37	0.434	0.121	0.222	1	508	35	0.349	0.637	0.142	0.265	1	508	36.8	0.381	0.602	0.144
2012-06-28	Day 2 am	2	2	27	1	1	2	4	686	52.3	0.637	0.744	0.225	0.398			1.7	0.049	0.219	0.12	0.05			3.19849	7.40741	25.6591	42.1053	11.8203		3	635	42.8	0.46	0.6	0.175	0.307	3	635	44.1	0.485	0.769	0.146	0.303	3	635	46.6	0.522	0.669	0.188
		2	2	27	2	1	2	3	635	45.9	0.507	0.609	0.18	0.321			2.1	0.038	0.259	0.025	0.062			4.47284	7.22433	35.0711	12.987	17.6136		3	635	44.5	0.49	0.687	0.19	0.336	3	635	45.5	0.507	0.785	0.204	0.366	3	635	44.1	0.481	0.779	0.184
2012-06-28	Day 2 am	2	3	36	1	2	1	2	540	42.6	0.459	0.569	0.137	0.265			2	0.031	0.034	0.034	0.035			4.80769	6.98985	5.80205	22.0779	12.3894		0	None	35.2	0.354	0.451	0.115	0.214	0	None	40.7	0.429	0.53	0.144	0.264	0	None	39.6	0.414	0.539	0.142
		2	3	36	2	2	1	1	508	41.9	0.451	0.602	0.126	0.255			1.8	0.036	0.023	0.044	0.053			4.20561	7.67591	3.74898	29.7297	18.8277		0	None	36.1	0.365	0.514	0.112	0.222	0	None	35.5	0.356	0.483	0.108	0.213	0	None	36.7	0.372	0.618	0.113
2012-06-25	Day 2 am	2	4	27	2	2	4	2	540	41.4	0.44	0.624	0.146	0.279			7.2	0.126	0.212	0.052	0.094			16	25.0497	29.0411	30.2326	28.8344		2	540	39.4	0.401	0.674	0.139	0.274	2	540	40.3	0.424	0.533	0.115	0.235	2	540	40.6	0.426	0.572	0.162
		2	4	27	2	2	4	2	540	44.3	0.489	0.656	0.18	0.323			2.1	0.037	0.079	0.009	0.006			4.63065	7.29064	11.3587	5.12821	1.84049		2	540	39.5	0.411	0.535	0.123	0.242	2	540	42.1	0.445	0.593	0.165	0.295	2	540	41.5	0.445	0.605	0.153
2012-06-28	Day 2 am	2	5	23	1	1	2	3	635	52.1	0.646	0.867	0.232	0.417			4.4	0.105	0.156	0.051	0.085			8.10313	15.0322	16.5079	19.8058	18.4984		3	635	48.1	0.557	0.782	0.205	0.373	2	540	43.7	0.496	0.614	0.18	0.32	2	540	40.6	0.428	0.587	0.138
		2	5	23	2	1	2	4	686	49.9	0.571	0.728	0.21	0.373			3.9	0.098	0.119	0.04	0.066			7.5217	15.8065	15.1111	17.3913	16.2562		3	635	44.7	0.497	0.654	0.162	0.306	3	635	44	0.483	0.698	0.169	0.316	3	635	42.5	0.451	0.861	0.145
2012-06-25	Day 2 am	2	6	24	1	2	1	2	540	43.5	0.475	0.658	0.175	0.315			2.5	0.042	0.036	0.007	0.017			5.58659	8.46774	5.32544	3.92157	5.25502		2	540	40.6	0.434	0.604	0.171	0.297	2	540	40.2	0.422	0.596	0.164	0.291	2	540	44.2	0.485	0.676	0.174
		2	6	24	2	2	1	3	635	47.9	0.559	0.664	0.199	0.348			4	0.078	0.047	0.042	0.053			8.7146	15	7.33802	23.5955	16.4852		2	540	41.6	0.444	0.634	0.145	0.28	2	540	42.3	0.457	0.573	0.154	0.28	1	508	39.2	0.407	0.545	0.135
2012-06-26	Day 2 am	2	7	28	1	2	1	0	None	29.5	0.284	0.405	0.105	0.191			0.1	0	0.05	0.003	0.01			0.338409	0	13.1579	2.89855	5.37634		0	None	31.8	0.31	0.494	0.113	0.213	0	None	25	0.233	0.459	0.066	0.152	0	None	24.8	0.232	0.308	0.083
		2	7	28	2	2	1	0	None	35.6	0.356	0.462	0.128	0.23			0.6	0.007	0.038	0.001	0.007			1.67131	1.94715	7.90021	0.77821	2.99786		0	None	33.9	0.334	0.409	0.11	0.202	0	None	30.2	0.289	0.462	0.107	0.201	0	None	27.8	0.262	0.368	0.091
2012-06-26	Day 2 am	2	8	24	1	2	1	4	686	54.1	0.692	0.877	0.26	0.457			1.3	0.009	0.025	0.003	0.01			2.37443	1.29218	2.81057	1.14723	2.1645		4	686	51.9	0.638	0.759	0.213	0.384	4	686	51.1	0.619	0.868	0.226	0.412	3	635	48.5	0.564	0.76	0.235
		2	8	24	2	2	1	4	686	57.1	0.774	1.162	0.317	0.558			5.7	0.15	0.186	0.056	0.096			10.5069	21.4592	17.3994	19.3772	18.8235		2	540	44.5	0.484	0.635	0.197	0.338	3	635	47.1	0.538	0.89	0.182	0.361	2	540	38.6	0.398	0.559	0.149
2012-06-26	Day 2 am	2	9	24	1	2	3	4	686	55.7	0.732	0.994	0.242	0.458			1.7	0.044	0.067	0.028	0.014			3.09936	6.19718	6.97553	10.9375	3.01075		4	686	52.9	0.662	0.975	0.205	0.41	4	686	56	0.742	0.938	0.233	0.443	4	686	55.4	0.723	0.931	0.236
		2	9	24	2	2	3	4	686	57.3	0.776	0.983	0.291	0.512			6.2	0.155	0.178	0.042	0.085			11.4391	22.1904	19.9105	15.5556	18.1044		4	686	54.6	0.704	0.876	0.257	0.454	4	686	53.5	0.654	0.885	0.221	0.413	3	635	51.7	0.64	0.231	0.231
2012-06-26	Day 2 am	2	10	26	1	2	1	2	540	39.1	0.446	0.626	0.167	0.299			6.8	0.069	0.156	0.022	0.052			16	14.36	22.1591	12.3596	16		2	540	42.6	0.453	0.599	0.161	0.293	3	635	47	0.536	0.832	0.182	0.354	2	540	41	0.435	0.584	0.137
		2	10	26	2	2	1	3	635	48.4	0.553	0.743	0.21	0.37			1.9	0.048	0.002	0.009	0.017			3.85005	8.31889	0.268817	4.1958	4.49141		2	540	43.9	0.481	0.61	0.147	0.284	3	635	46.7	0.534	0.729	0.18	0.337	3	635	43.2	0.458	0.653	0.154
2012-06-26	Day 2 am	2	11	48	1	1	1	1	508	37.6	0.384	0.546	0.129	0.244			4.4	0.058	0.096	0.016	0.035			12.4294	16.338	19.2771	13.2231	15.4525		0	None	30	0.289	0.441	0.087	0.178	0	None	27.9	0.267	0.042	0.067	0.154	0	None	28.8	0.275	0.428	0.09
		2	11	48	2	1	1	1	508	31.9	0.311	0.455	0.109	0.204			1.6	0.12	0.363	0.353	0.126			4.89297	47.8088	132.724	123.643	47.191		0	None	32.7	0.321	0.401	0.105	0.195	0	None	15.5	0.138	0.309	0.041	0.097	0	None	16	0.143	0.181	0.047
2012-06-26	Day 2 am	2	12	27	1	1	1	1	508	41.1	0.434	0.606	0.155	0.284			1.3	0.013	0.168	0.001	0.026			3.11377	2.95119	24.3478	0.643087	8.75421		0	None	36.9	0.378	0.574	0.11	0.221	0	None	35	0.349	0.662	0.118	0.245	0	None	26.5	0.25	0.469	0.096
		2	12	27	2	1	1	0	None	32.7	0.322	0.481	0.08	0.18			2.5	0.037	0.009	0.014	0.016			7.94913	12.1911	1.85376	16.092	8.51064		0	None	30.9	0.3	0.432	0.077	0.169	0	None	23.3	0.216	0.368	0.061	0.134	0	None	28.1	0.267	0.447	0.087
2012-06-26	Day 2 am	2	13	58	1	2	3	0	None	21.5	0.194	0.235	0.079	0.132			1.8	0.021	0.047	0.016	0.025			8.03571	10.2689	18.1818	18.3908	17.301		0	None	25.1	0.233	0.225	0.105	0.163	0	None	19.1	0.173	0.243	0.094	0.146	0	None	19.7	0.179	0.175	0.11
		2	13	58	2	2	3	0	None	25.4	0.236	0.281	0.116	0.181			9.8	0.099	0.093	0.051	0.075			47.8049	53.0831	39.6588	56.3536	52.2648		0	None	7.8	0.068	0.215	0.061	0.096	0	None	17.5	0.158	0.18	0.051	0.093	0	None	16.3	0.145	0.06	0.041
2012-06-26	Day 2 am	2	14	26	1	2	3	3	635	50.1	0.594	0.925	0.152	0.343			9.6	0.167	0.29	0.007	0.065			21.1921	32.713	37.1795	4.7138	20.934		2	540	48.1	0.557	0.829	0.173	0.346	2	540	44.7	0.495	0.702	0.156	0.306	2	540	41.9	0.444	0.637	0.13
		2	14	26	2	2	3	3	635	50.1	0.598	0.928	0.176	0.367			0.7	0.014	0.081	0.027	0.018			1.38751	2.31405	9.12676	14.248	4.78723		2	540	42.8	0.461	0.599	0.14	0.272	2	540	41.4	0.439	0.721	0.127	0.271	2	540	46.9	0.534	0.719	0.152
2012-06-26	Day 2 am	2	15	28	1	1	3	1	508	32.4	0.315	0.499	0.114	0.215			10.2	0.145	0.139	0.022	0.058			27.2	37.4194	24.4503	17.6	23.7705		1	508	36.9	0.376	0.521	0.14	0.252	1	508	36	0.363	0.517	0.114	0.224	1	508	37.3	0.38	0.573	0.117
		2	15	28	2	1	3	1	508	36	0.363	0.615	0.115	0.238			2.6	0.034	0.053	0.01	0.021			7.4928	9.82659	9.00595	9.09091	9.23077		0	None	30.2	0.291	0.475	0.083	0.178	0	None	31.5	0.306	0.477	0.097	0.195	0	None	31.2	0.303	0.484	0.096
							Mean			42.5033	0.480233	0.652267	0.168333	0.309333			3.54667	0.0635667	0.1106	0.0379	0.0441			9.10907	14.5334	19.3455	19.038	14.8416				38.8233	0.417233	0.570433	0.142933	0.265867	0	0	37.8833	0.4082	0.584967	0.1383	0.264	0	0	37.11	0.394233	0.534733	0.136567
							SD			9.39679	0.155509	0.213671	0.0594964	0.102713			2.80501	0.0490578	0.0909523	0.0643044	0.0318177			9.46159	13.177	23.8955	23.2648	11.8229				9.25321	0.131163	0.171112	0.0457036	0.0808092	0	0	10.4383	0.146968	0.217966	0.0521001	0.0925016	0	0	9.89749	0.136654	0.202182	0.0485192
							Min			21.5	0.194	0.235	0.079	0.132			0.1	0	0.002	0.001	0.006			0.338409	0	0.268817	0.643087	1.84049				7.8	0.068	0.215	0.061	0.096	0	0	15.5	0.138	0.042	0.041	0.093	0	0	16	0.143	0.06	0.041
							Max			57.3	0.776	1.162	0.317	0.558			10.2	0.167	0.363	0.353	0.126			47.8049	53.0831	132.724	123.643	52.2648				54.6	0.704	0.975	0.257	0.454	0	0	56	0.742	0.938	0.233	0.443	0	0	55.4	0.723	0.931	0.236
							±			42.5033333333333 ± 9.39678900892006 (57.3)	0.480233333333333 ± 0.15550888284493 (0.776)	0.652266666666667 ± 0.213671022244773 (1.162)	0.168333333333333 ± 0.0594963536021665 (0.317)	0.309333333333333 ± 0.102712633387872 (0.558)			3.54666666666667 ± 2.80501193473807 (10.2)	0.0635666666666667 ± 0.0490578007669724 (0.167)	0.1106 ± 0.0909522800229841 (0.363)	0.0379 ± 0.064304421470764 (0.353)	0.0441 ± 0.0318177460785211 (0.126)			9.10906814546617 ± 9.46159363269674 (47.8048780487805)	14.5333674148104 ± 13.177003945997 (53.083109919571)	19.3455257341316 ± 23.8954636112854 (132.7239488117)	19.0380436080114 ± 23.2647823524755 (123.642732049037)	14.8416025630202 ± 11.8228763980731 (52.2648083623693)				38.8233333333333 ± 9.25320758303371 (54.6)	0.417233333333333 ± 0.131163410408105 (0.704)	0.570433333333333 ± 0.171111918070446 (0.975)	0.142933333333333 ± 0.0457036430550753 (0.257)	0.265866666666667 ± 0.0808091550520722 (0.454)			37.8833333333333 ± 10.4382943293311 (56)	0.4082 ± 0.146968305285939 (0.742)	0.584966666666667 ± 0.217966381990803 (0.938)	0.1383 ± 0.0521001356805434 (0.233)	0.264 ± 0.092501630926908 (0.443)			37.11 ± 9.89748661930445 (55.4)	0.394233333333333 ± 0.136653774272753 (0.723)	0.534733333333333 ± 0.202182391766024 (0.931)	0.136566666666667 ± 0.0485192342473994 (0.236)
							(
							)
[truncated: 1 more columns]

## Sheet: PM1
								Visante Light ON 270									Visante Light OFF 270							Visante Light OFF 265							Visante Light OFF 275
Date	Time	Groups	ID	Age	Study eye	Gender	Ethinicity	Groups Impfit	Largest implant fitted	SS angle	AOD500	AOD750	TISA500	TISA750	Groups Impfit	Largest Implant fitted	SS angle	AOD500	AOD750	TISA500	TISA750	Groups Impfit	Largest Implant fitted	SS angle	AOD500	AOD750	TISA500	TISA750	Groups Impfit	Largest Implant fitted	SS angle	AOD500	AOD750	TISA500	TISA750
2012-06-26	Day 2 Pm	3	1	42	1	2	2	0	None	38.2	0.349	0.454	0.133	0.239	1	508	34.6	0.344	0.586	0.122	0.239	0	None	32.6	0.32	0.423	0.118	0.211	1	508	36.8	0.376	0.544	0.159	0.272
		3	1	42	2	2	2	1	508	37.4	0.383	0.477	0.13	0.238	1	508	38.8	0.4	0.651	0.153	0.284	1	508	38.6	0.398	0.666	0.15	0.282	1	508	37.6	0.385	0.54	0.143	0.258
2012-06-28	Day 2 Pm	3	2	27	1	1	2	4	686	54	0.686	0.963	0.345	0.448	3	635	48.8	0.56	0.888	0.184	0.365	2	540	39.9	0.417	0.578	0.134	0.258	3	635	46.5	0.528	0.728	0.157	0.314
		3	2	27	2	1	2	4	686	48	0.545	0.868	0.205	0.383	2	540	44.3	0.481	0.721	0.189	0.34	3	635	44	0.483	0.726	0.181	0.333	3	635	45.5	0.507	0.781	0.195	0.355
2012-06-28	Day 2 Pm	3	3	36	1	2	1	1	508	40.6	0.428	0.603	0.171	0.3	0	None	37.9	0.388	0.453	0.124	0.229	0	None	37.9	0.389	0.521	0.15	0.264	0	None	39.2	0.408	0.499	0.156	0.269
		3	3	36	2	2	1	2	540	43.7	0.487	0.625	0.17	0.308	0	None	37	0.377	0.572	0.114	0.233	0	None	36.8	0.374	0.537	0.112	0.226	0	None	35.3	0.354	0.501	0.114	0.221
2012-06-25	Day 2 Pm	3	4	27	1	2	4	2	540	48.6	0.566	0.836	0.198	0.373	2	540	40.5	0.427	0.603	0.169	0.298	2	540	41.9	0.448	0.538	0.156	0.279	2	540	42.7	0.462	0.669	0.201	0.342
		3	4	27	2	2	4	2	540	46.4	0.526	0.735	0.171	0.329	2	540	44.6	0.493	0.759	0.163	0.319	2	540	45	0.499	0.688	0.173	0.321	2	540	46.2	0.521	0.639	0.171	0.316
2012-06-28	Day 2 Pm	3	5	23	1	1	2	4	686	56.5	0.751	1.023	0.283	0.502	2	540	40.2	0.429	0.523	0.163	0.279	3	635	54.3	0.505	0.665	0.151	0.289	2	540	42	0.45	0.569	0.169	0.296
		3	5	23	2	1	2	4	686	53.8	0.669	0.847	0.25	0.439	3	635	44.2	0.486	0.689	0.177	0.342	2	540	40.3	0.424	0.593	0.32	0.259	2	540	41.4	0.445	0.624	0.143	0.275
2012-06-25	Day 2 Pm	3	6	24	1	2	1	3	635	46	0.517	0.694	0.182	0.332	2	540	39	0.406	0.592	0.156	0.279	2	540	44.3	0.488	0.736	0.178	0.331	2	540	45.2	0.504	0.645	0.179	0.323
		3	6	24	2	2	1	2	540	43.9	0.481	0.617	0.157	0.295	1	508	35.6	0.357	0.505	0.135	0.243	2	540	45.1	0.502	0.633	0.153	0.295	2	540	43.6	0.476	0.663	0.172	0.314
2012-06-26	Day 2 Pm	3	7	28	1	2	1	0	None	29.6	0.284	0.355	0.102	0.181	0	None	30.6	0.296	0.477	0.096	0.192	0	None	26.2	0.245	0.431	0.08	0.164	0	None	28.2	0.267	0.442	0.094	0.182
		3	7	28	2	2	1	0	None	36.2	0.363	0.5	0.129	0.237	0	None	33.1	0.325	0.408	0.102	0.194	1	508	40.5	0.426	0.61	0.139	0.268	0	None	32.4	0.317	0.422	0.095	0.188
2012-06-26	Day 2 Pm	3	8	24	1	2	1	4	686	55.4	0.701	0.902	0.263	0.467	3	635	49.7	0.59	0.826	0.22	0.397	4	686	52	0.64	0.815	0.216	0.398	4	686	52.5	0.652	0.814	0.261	0.445
		3	8	24	2	2	1	4	686	51.4	0.624	0.976	0.261	0.462	4	686	49.9	0.594	0.762	0.249	0.418	4	686	50.5	0.605	1.02	0.202	0.405	3	635	47.1	0.539	0.74	0.169	0.329
2012-06-26	Day 2 Pm	3	9	24	1	2	3	4	686	54	0.688	0.927	0.27	0.472	4	686	56.3	0.75	1.146	0.22	0.457	4	686	55	0.717	0.944	0.201	0.408	4	686	53.1	0.666	0.878	0.238	0.431
		3	9	24	2	2	3	3	635	51.1	0.621	0.805	0.249	0.427	4	686	52.9	0.662	0.932	0.229	0.428	4	686	51.1	0.621	0.812	0.218	0.397	3	635	49	0.576	0.817	0.195	0.269
2012-06-26	Day 2 Pm	3	10	26	1	2	1	2	540	45.9	0.515	0.782	0.189	0.351	2	540	39.3	0.418	0.59	0.154	0.28	3	635	46.7	0.531	0.737	0.168	0.327	2	540	35.5	0.356	0.539	0.105	0.217
		3	10	26	2	2	1	3	635	50.3	0.601	0.745	0.219	0.387	2	540	40.8	0.421	0.637	0.155	0.289	2	540	46.7	0.52	0.684	0.182	0.329	2	540	41.3	0.43	0.578	0.163	0.291
2012-06-26	Day 2 Pm	3	11	48	1	1	1	1	508	33.2	0.326	0.45	0.113	0.209	0	None	24.6	0.229	0.386	0.075	0.152	0	None	22.7	0.209	0.37	0.073	0.146	0	None	23.8	0.22	0.367	0.078	0.152
		3	11	48	2	1	1	0	None	33.5	0.191	0.092	0.462	0.33	0	None	10.3	0.091	0.288	0.044	0.092	0	None	12.5	0.111	0.309	0.049	0.101	0	None	7.6	0.067	0.238	0.035	0.073
2012-06-26	Day 2 Pm	3	12	27	1	1	1	2	540	42.4	0.447	0.774	0.156	0.31	0	None	34.7	0.346	0.499	0.095	0.2	0	None	36	0.363	0.609	0.101	0.223	0	None	36.7	0.372	0.5	0.121	0.23
		3	12	27	2	1	1	0	None	30.2	0.285	0.49	0.094	0.196	0	None	27	0.254	0.366	0.072	0.15	0	None	20.3	0.185	0.356	0.047	0.114	0	None	25.7	0.24	0.416	0.08	0.162
2012-06-26	Day 2 Pm	3	13	58	1	2	3	0	None	23.3	0.215	0.282	0.095	0.157	0	None	15.8	0.14	0.197	0.035	0.078	0	None	20	0.181	0.171	0.09	0.134	0	None	19.8	0.18	0.151	0.056	0.093
		3	13	58	2	2	3	0	None	15.6	0.137	0.188	0.065	0.106	0	None	28.3	0.268	0.184	0.083	0.139	0	None	26.1	0.244	0.219	0.067	0.123	0	None	26.1	0.245	0.208	0.007	0.134
2012-06-26	Day 2 Pm	3	14	26	1	2	3	2	540	40.5	0.427	0.635	0.145	0.278	2	540	45.3	0.505	0.758	0.153	0.311	3	635	53.9	0.67	0.895	0.232	0.43	2	540	44.1	0.438	0.721	0.154	0.305
		3	14	26	2	2	3	4	686	50.8	0.612	0.847	0.203	0.385	2	540	43	0.465	0.727	0.154	0.303	2	540	46.4	0.525	0.707	0.135	0.289	2	540	45.1	0.501	0.72	0.156	0.309
2012-06-26	Day 2 Pm	3	15	28	1	1	3	1	508	42.6	0.46	0.638	0.136	0.273	0	None	35.9	0.362	0.538	0.107	0.22	0	None	32.1	0.313	0.457	0.103	0.119	0	None	28.1	0.267	0.434	0.079	0.167
		3	15	28	2	1	3	1	508	33.4	0.329	0.562	0.105	0.217	1	508	31.5	0.306	0.494	0.082	0.182	1	508	30.3	0.292	0.464	0.092	0.186	1	508	35.8	0.36	0.509	0.104	0.213
							Mean			42.55	0.4738	0.6564	0.188367	0.321033			37.8167	0.405667	0.5919	0.139133	0.2644			38.99	0.4215	0.597133	0.1457	0.263633			37.7967	0.403633	0.5632	0.1383	0.258167
							SD			9.99892	0.163288	0.237288	0.0841663	0.103749			10.1416	0.143371	0.212367	0.0540987	0.0962549			11.2356	0.154834	0.20356	0.0605134	0.0965189			10.2829	0.138343	0.1809	0.0574325	0.0891392
							Min			15.6	0.137	0.092	0.065	0.106			10.3	0.091	0.184	0.035	0.078			12.5	0.111	0.171	0.047	0.101			7.6	0.067	0.151	0.007	0.073
							Max			56.5	0.751	1.023	0.462	0.502			56.3	0.75	1.146	0.249	0.457			55	0.717	1.02	0.32	0.43			53.1	0.666	0.878	0.261	0.445
							±
							(			42.55 ± 9.99892235572723 (56.5)	0.4738 ± 0.163288067853864 (0.751)	0.6564 ± 0.237288214102016 (1.023)	0.188366666666667 ± 0.084166289972982 (0.462)	0.321033333333333 ± 0.103748529971583 (0.502)			37.8166666666667 ± 10.1415867402096 (56.3)	0.405666666666667 ± 0.143370831769572 (0.75)	0.5919 ± 0.21236701315379 (1.146)	0.139133333333333 ± 0.0540987177700895 (0.249)	0.2644 ± 0.0962549058310885 (0.457)			38.99 ± 11.2355761941163 (55)	0.4215 ± 0.154834004551705 (0.717)	0.597133333333333 ± 0.203560163661472 (1.02)	0.1457 ± 0.0605134068929614 (0.32)	0.263633333333333 ± 0.0965188862466764 (0.43)			37.7966666666667 ± 10.2828777447096 (53.1)	0.403633333333333 ± 0.138342773531926 (0.666)	0.5632 ± 0.180900315472171 (0.878)	0.1383 ± 0.0574325091167735 (0.261)	0.258166666666667 ± 0.0891392105112823 (0.445)
							)

## Sheet: % changes
	(LIGHTS)		AOD500	AOD750	TISA500	TISA750	SS Angle		Table 2
	IC 270	Morning	0.48	0.652	0.168	0.309	42.5		a.	lights on vs off	AOD500	AOD750	TISA500	TISA750	SS Angle	mean
	(ON)		(0.194-0.776mm)	(0.235-1.162mm)	(0.079-0.317mm2)	(0.132-0.558mm2)	(21.5-57.3º)			morning	0.151079	0.14386	0.174825	0.161654	0.0953608	0.145356
		Afternoon	0.474	0.656	0.188	0.321	42.55			afternoon	0.167488	0.108108	0.352518	0.215909	0.125066	0.193818
			(0.137-0.751mm)	(0.092-1.023mm)	(0.065-0.462mm2)	(0.106-0.502mm2)	(15.6-56.5º)								total avg change	0.169587
	IC 270	Morning	0.417	0.57	0.143	0.266	38.8
	(OFF)		(0.068-0.704mm)	(0.215-0.975mm)	(0.061-0.257mm2)	(0.096-0.454mm2)	(7.8-54.6º)		b.	morning vs afternoon	AOD500	AOD750	TISA500	TISA750	SS Angle	mean
		Afternoon	0.406	0.592	0.139	0.264	37.82			IC270 on	0.0126582	-0.00609756	-0.106383	-0.0373832	-0.00117509	-0.0276761
			(0.091-0.75mm)	(0.184-1.146mm)	(0.035-0.249mm2)	(0.078-0.457mm2)	(10.3-56.3º)			IC270 off	0.0270936	-0.0371622	0.028777	0.00757576	0.0259122	0.0104393
	IC265	Morning	0.408	0.585	0.138	0.264	37.9			IC265 off	-0.0331754	-0.0201005	-0.0547945	0	-0.0282051	-0.0272551
	(OFF)		(0.138-0.742mm)	(0.042-0.938mm)	(0.041-0.233mm2)	(0.093-0.443mm2)	(15.5-56º)			IC275 off	-0.0247525	-0.0497336	-0.00724638	-0.0155039	-0.0185185	-0.023151
		Afternoon	0.422	0.597	0.146	0.264	39								total avg change	-0.0169107
			(0.111-0.717mm)	(0.171-1.02mm)	(0.047-0.32mm2)	(0.101-0.43mm2)	(12.5-55º)
	IC275	Morning	0.394	0.535	0.137	0.254	37.1		c.		AOD500	AOD750	TISA500	TISA750	SS Angle	mean
	(OFF)		(0.143-0.723mm)	(0.06-0.931mm)	(0.041-0.236mm2)	(0.067-0.443mm2)	(16-55.4º)		IC270 vs 265	morning	0.0220588	-0.025641	0.0362319	0.00757576	0.0237467	0.0127944
		Afternoon	0.404	0.563	0.138	0.258	37.8			afternoon	-0.0379147	-0.00837521	-0.0479452	0	-0.0302564	-0.0248983
			(0.067-0.666mm)	(0.151-0.878mm)	(0.007-0.261mm2)	(0.073-0.445mm2)	(7.6-53.1º)		IC270 vs 275	morning	0.0583756	0.0654206	0.0437956	0.0472441	0.0458221	0.0521316
										afternoon	0.0049505	0.0515098	0.00724638	0.0232558	0.000529101	0.0174983
									IC265 vs 275	morning	0.035533	0.0934579	0.00729927	0.0393701	0.0215633	0.0394447
										afternoon	0.0445545	0.0603908	0.057971	0.0232558	0.031746	0.0435836
															total avg change	0.0234257
